# Supplementary material
Source: publisher figshare collection journal article supplement (https://frontiersin.figshare.com/ndownloader/files/13722764)

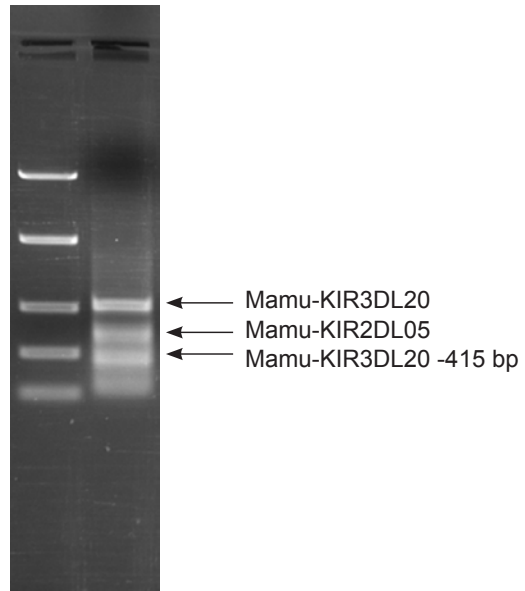

Supplement: Supplementary file [file 13722764]
